# Supplementary material
Source: PubMed Central journal article supplement (PMC1895977)

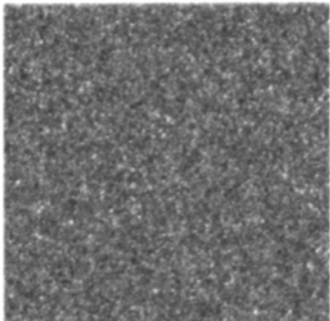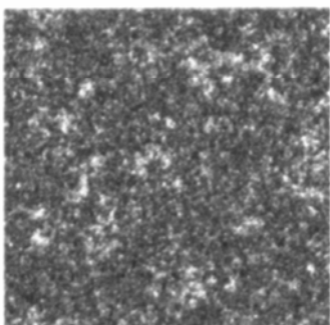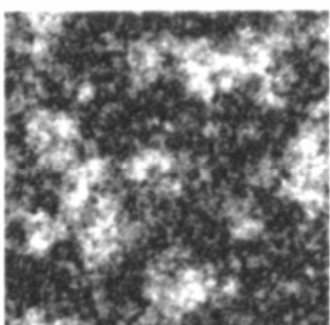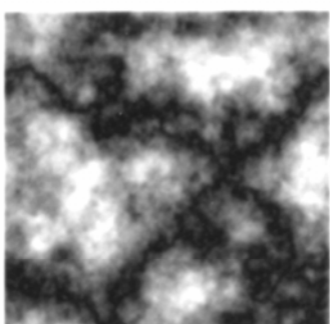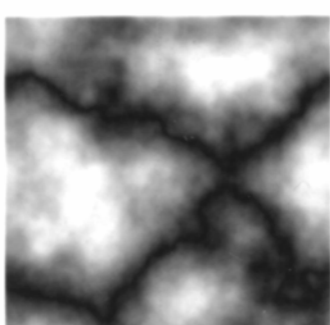

Supplement: pnas_0610813104_1.pdf [file pnas_0610813104_1.pdf]
